# Supplementary material for: A virtual screen identified C96 as a novel inhibitor of phosphatidylinositol 3-kinase that displays potent preclinical activity against multiple myeloma in vitro and in vivo
Source: PubMed Central journal article supplement (PMC4116524; doi:10.18632/oncotarget.1657), 2014-05-22
Supplement: oncotarget-05-3836-s001.pdf [file oncotarget-05-3836-s001.pdf]

SUPPLEMENTARY FIGURES AND TABLE

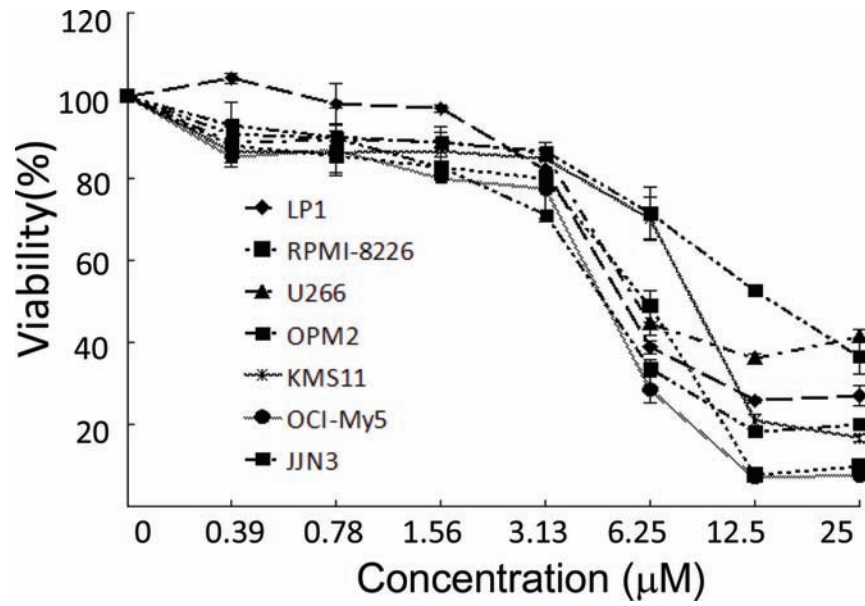

**Supplementary Figure S1: C96 inhibits multiple myeloma cell proliferation.** MM cell lines were treated with C96 with indicated concentrations for 72 hrs, followed by MTT assay.

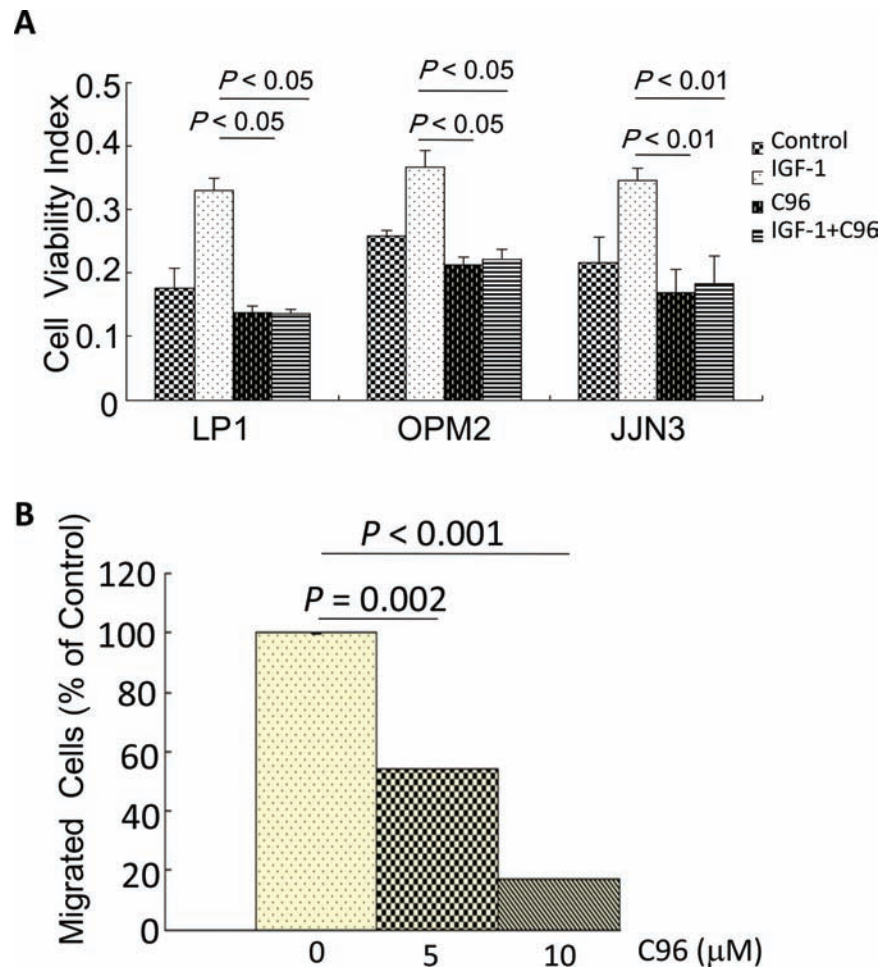

**Supplementary Figure S2: C96 inhibits MM cell proliferation and migration in the presence of IGF-1.** (A) MM cell lines LP1, OPM2, and JJN3 were maintained in IMDM media containing 0.5% FBS for 12 hrs, followed by C96 treatment alone or in combination with 100 ng/ml of IGF-1. Cells were then incubated for another 24 hr, cell number was analyzed using MTT staining. (B) LP1 cells were serum-starved overnight and then re-suspended in 70  $\mu$ L of IMDM medium/0.5% fetal calf serum with or without C96. Cells were loaded onto the upper chamber of a transwell, and the lower chamber was filled with IMDM containing agonist IGF-1. After 6 hrs, cells migrating into the lower chamber were counted using a hemacytometer.

**Supplemental Table 1: C96 fails to inhibit AKT and mTOR catalytic activity**

| Conc (M) of C96 | AKT1    | AKT2    | AKT3    | mTOR    |
|-----------------|---------|---------|---------|---------|
| 3.00E-04        | 57.61%  | 86.10%  | 79.18%  | 102.57% |
| 1.00E-04        | 89.13%  | 910.98% | 98.26%  | 101.78% |
| 3.33E-05        | 100.86% | 100.38% | 108.59% | 100.02% |
| 1.11E-05        | 104.72% | 102.16% | 100.98% | 102.93% |
| 3.70E-06        | 110.72% | 102.25% | 117.76% | 101.74% |
| 1.23E-06        | 101.71% | 97.18%  | 100.31% | 99.81%  |
| 4.12E-07        | 99.76%  | 100.48% | 106.62% | 99.37%  |
| 1.37E-07        | 102.27% | 97.27%  | 100.29% | 100.28% |
| 4.57E-08        | 103.80% | 100.26% | 102.54% | 99.19%  |
| 1.52E-08        | 94.32%  | 95.67%  | 109.49% | 96.95%  |
| DMSO            | 96.79%  | 100.91% | 100.12% | 98.54%  |
